# Supplementary material for: Effects of Ozone Stress on Rhizosphere Soil of Poplar Seedlings
Source: MDPI journal article supplement (doi:10.3390/f15010205), 2024-01-19
Supplement: s1 [file s1]

**Supporting Information for:**

**Effects of ozone stress on rhizosphere soil of poplar seedlings**

**Qin Wang <sup>1,\*</sup>, Qingqing Yang <sup>1</sup>, Meng Zhang <sup>1</sup>, Jianwei Ma <sup>1</sup>, Laiye Qu <sup>2,\*</sup>**

<sup>1</sup> School of Eco-Environment, Hebei University, Baoding 071000, China;  
yangqqing@stumail.hbu.edu.cn (Q.Y.); zhangmeng2@stumail.hbu.edu.cn (M.Z.);  
mjw@hbu.edu.cn (J.M.)

<sup>2</sup> Research Center for Eco-Environmental Sciences, Chinese Academy of Sciences,  
Beijing 100085, China

\* Correspondence: wangqin25786@hbu.edu.cn (Q.W.); lyqu@rcees.ac.cn (L.Q.)

Table S1. Measured soil enzymes and corresponding substrates.

| Types of enzymes                 | EC numbers  | Shorthands | Substrates                               |
|----------------------------------|-------------|------------|------------------------------------------|
| Alkaline phosphatase             | EC 3.1.3.1  | AKP        | 4-MUB-phosphate                          |
| $\beta$ -1, 4-glucosidase        | EC3.2.1.21  | $\beta$ G  | 4-MUB- $\beta$ -d-glucoside              |
| Cellobiohydrolase                | EC3.2.1.91  | CBH        | 4-MUB- $\beta$ -d-cellobioside           |
| $\beta$ -N-acetylglucosaminidase | EC3.2.1.14  | NAG        | 4-MUB-N-acetyl- $\beta$ -d-glucosaminide |
| Leucyl aminopeptidase            | EC 3.4.11.1 | LAP        | l-Leucine-7-amido-4-methylcoumarin       |

Table S2. Correlation between soil enzyme activities and soil physicochemical indices.

| Enzymes   | SOM    | TN     | TP     | TK     | AN    | AP     | AK     | pH          |
|-----------|--------|--------|--------|--------|-------|--------|--------|-------------|
| AKP       | -0.455 | 0.063  | 0.098  | -0.434 | 0.14  | -0.179 | -0.514 | -0.042      |
| $\beta$ G | -0.098 | 0.028  | -0.336 | -0.091 | 0.298 | 0.214  | 0.264  | 0.14        |
| CBH       | 0.203  | 0.035  | 0.112  | -0.175 | 0.172 | -0.224 | 0.06   | 0.021       |
| LAP       | -0.091 | -0.084 | -0.357 | -0.056 | 0.039 | 0.007  | 0.014  | —<br>0.594* |
| NAG       | 0.699* | 0.343  | 0.238  | -0.406 | 0.467 | -0.147 | 0.313  | 0.308       |

\* $P < 0.05$ .

Table S3. Mental analysis of the relationship between microbial community composition and soil indices.

| Treatment | $r^a$  | $p^a$ | $r^b$   | $p^b$ |
|-----------|--------|-------|---------|-------|
| SOM       | 0.0309 | 0.38  | −0.1775 | 0.857 |
| TN        | 0.207  | 0.167 | −0.145  | 0.842 |
| TP        | −0.151 | 0.673 | 0.003   | 0.427 |
| TK        | −0.005 | 0.448 | −0.209  | 0.952 |
| AN        | 0.085  | 0.326 | −0.123  | 0.781 |
| AP        | 0.177  | 0.079 | 0.015   | 0.358 |
| AK        | 0.35   | 0.135 | −0.22   | 0.947 |
| pH        | −0.624 | 0.583 | −0.092  | 0.766 |
| AKP       | −0.182 | 0.827 | 0       | 0.457 |
| βG        | −0.02  | 0.459 | −0.101  | 0.743 |
| LAP       | 0.355  | 0.077 | −0.243  | 0.972 |
| NAG       | −0.129 | 0.56  | −0.089  | 0.656 |

r: The correlation coefficient of the Mental test. <sup>a</sup> bacteria, <sup>b</sup> fungi.
